# Supplementary material for: Apoptosis-Inducing Effect of Three Medicinal Plants on Oral Cancer Cells KB and ORL-48
Source: PubMed Central journal article supplement (PMC4134791; doi:10.1155/2014/125353), 2014-07-24
Supplement: 125353.f1.pdf [file 125353.f1.pdf]

(A)

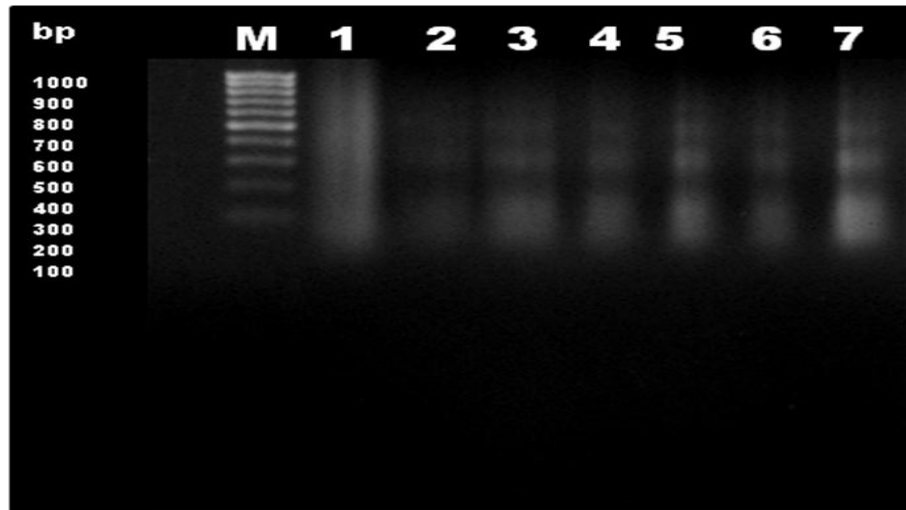

(B)

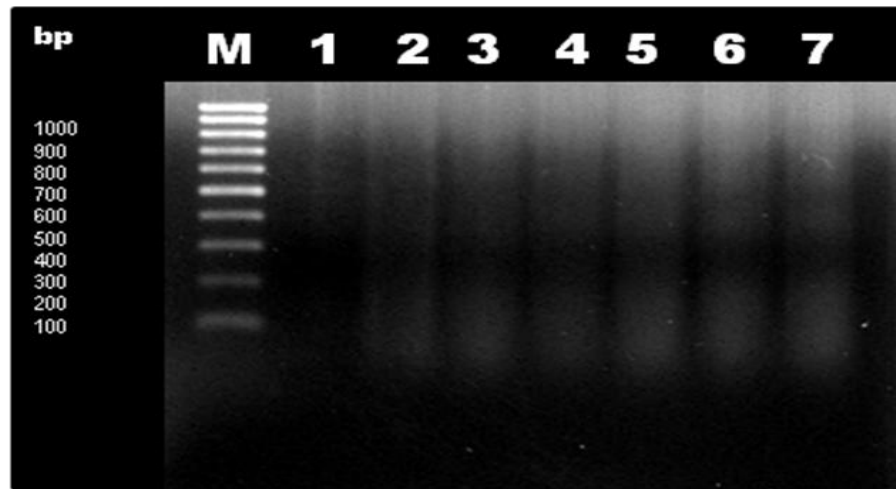

**Supporting 1:** Expression of DNA fragments from KB (A) and ORL-48 (B) cells after treatment with various concentrations of *A. indica* extract. Lane 1, negative control; Lane 2-7, cancer cells treated with 1.0, 10.0, 25.0, 50.0, 75.0 and 100.0  $\mu\text{g}/\text{mL}$  of *A. indica* extract, respectively.

(A)

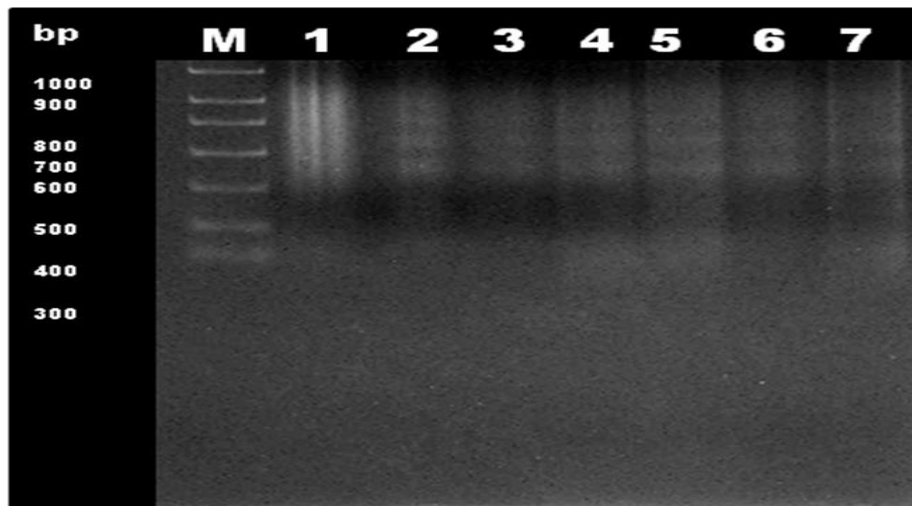

(B)

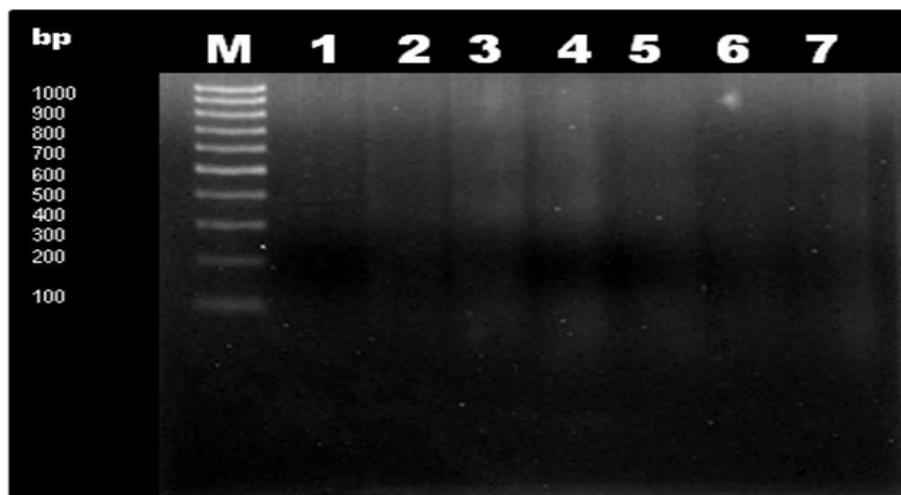

**Supporting 2:** Expression of DNA fragments from KB (A) and ORL-48 (B) cells after treatment with various concentrations of *T. flagelliforme* extract. Lane 1, negative control; Lane 2-7, cancer cells treated with 1.0, 10.0, 25.0, 50.0, 75.0 and 100.0  $\mu\text{g}/\text{mL}$  of *T. flagelliforme* extract, respectively.

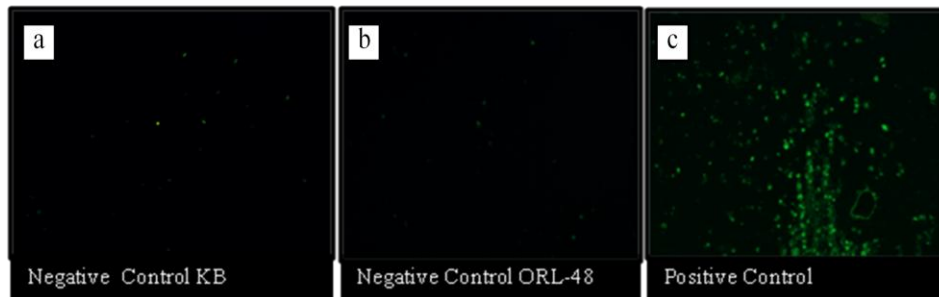

**Supporting 3:** Images of untreated KB (a) and ORL-48 (b) cells to represent as negative control and (c) actinomycin D-treated cells to represent as positive control. Observed the presence of green fluorescent spots showing the presence of apoptotic cells following treatment with Actinomycin D. (10x magnification).
